# Supplementary material for: Electroanalytical detection of pindolol: comparison of unmodified and reduced graphene oxide modified screen-printed graphite electrodes
Source: Royal Society of Chemistry journal article supplement (doi:10.1039/c4an02005g), 2015-01-01

*ESI*

**ESI Table 1.**

De-convolution of the functional group percentages *via* XPS for RGO

| <b><i>Functional<br/>group</i></b>       | <b>at%</b> | <b>Binding energy<br/>(eV)</b> |
|------------------------------------------|------------|--------------------------------|
| <i>C-C or C-H<br/>and<br/>C-graphite</i> | 71.55      | 284.7                          |
| <i>C-O/C-OH</i>                          | 14.98      | 286.39                         |
| <i>C=O</i>                               | 4.05       | 288.2                          |
| <i>O-C=O</i>                             | 5.01       | 533.61                         |
| <i>OH or ester</i>                       | 3.12       | 531.85                         |
| <i>Oxygen<br/>(inorganic)</i>            | 1.29       | 530.49                         |

## ESI Figure 1.

XPS spectra of RGO on SPE, (A) C1s fitted spectrum, (B) O1s fitted spectrum and (C) full XPS spectrum of the sample.

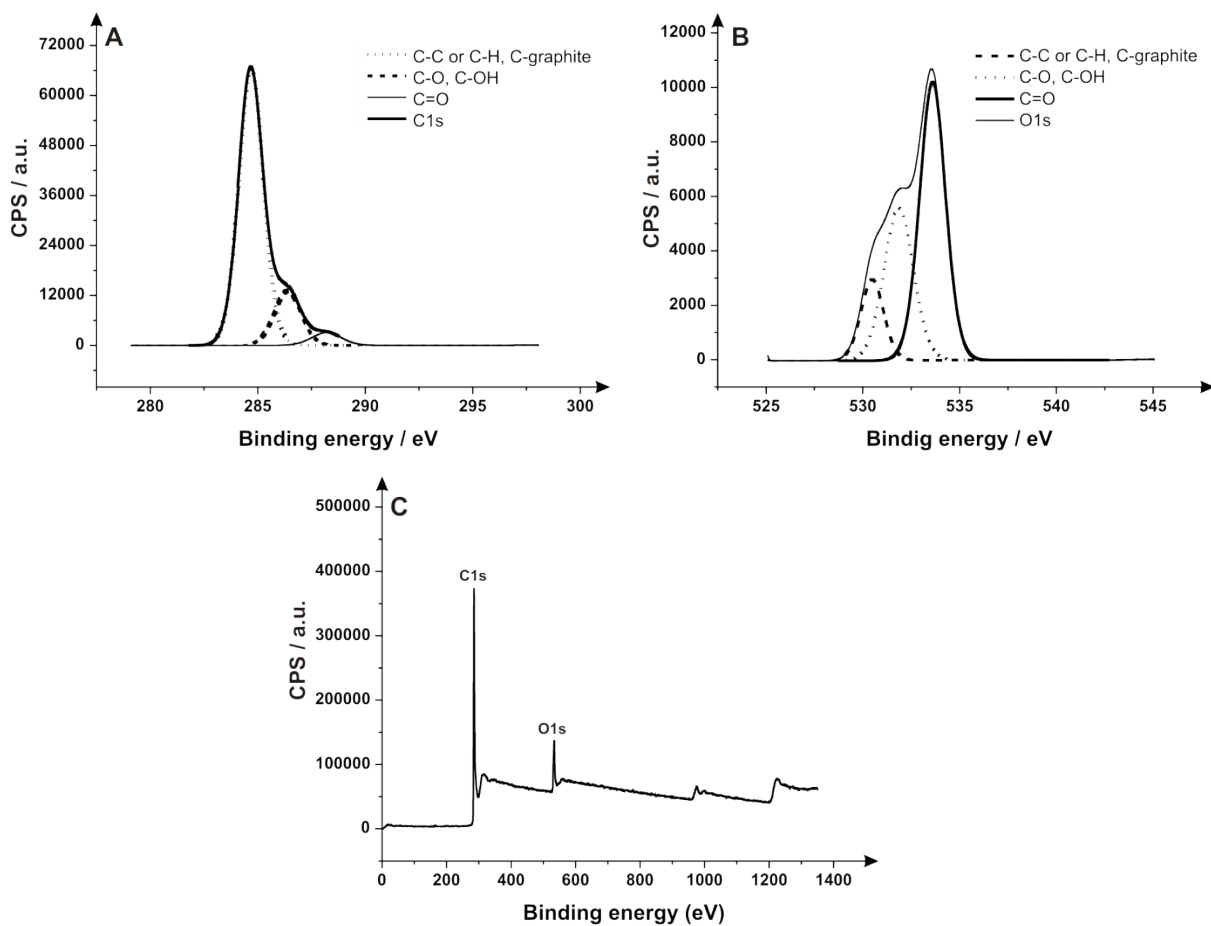

Supplement: c4an02005g1.pdf [file c4an02005g1.pdf]
